# Supplementary material for: Systematic investigation of the mechanism of herbal medicines for the treatment of prostate cancer
Source: Aging (Albany NY). 2023 Feb 10;15(4):1004–24. doi: 10.18632/aging.204516 (PMC10008508; doi:10.18632/aging.204516)
Supplement: Supplementary Table 1 [file aging-15-204516-s001.xlsx]

## Sheet: Sheet1
Supplementary Table 1. ADME parameters of potential ingredients in PCa-related herbal medicines.
HerbName	Re-name ID	Molecule Name	OB (%)	DL
Lobeliae Chinensis Herba	BB01	(+)-medioresinol	87.19	0.79
Lobeliae Chinensis Herba	BB02	Quercetin (adenine)	46.43	0.28
Lobeliae Chinensis Herba	BB03	scoparone	74.75	0.28
Lobeliae Chinensis Herba	BB04	Hesperetin	70.31	0.3
Lobeliae Chinensis Herba	BB05	isoferulic acid	50.83	0.62
Hedyotis Diffusae Herba	BH01	β-sitosterol	36.91	0.71
Hedyotis Diffusae Herba	BH02	ursolic acid	16.77	0.76
Hedyotis Diffusae Herba	BH03	p-coumaric acid	43.29	0.76
Hedyotis Diffusae Herba	BH04	Stigmasterol	43.83	0.62
Scutellariae Barbatae Herba	BL01	2-Pentylfuran	54.59	0.63
Scutellariae Barbatae Herba	BL02	stearic acid	17.83	0.75
Scutellariae Barbatae Herba	BL03	Methyleugenol	73.36	0.21
Scutellariae Barbatae Herba	BL04	scutellarein	18.97	0.25
Scutellariae Barbatae Herba	BL05	scutellarin	2.64	0.26
Scutellariae Barbatae Herba	BL06	Coumaran	50.9	0.28
Scutellariae Barbatae Herba	BL07	eriodictyol	71.79	0.33
Scutellariae Barbatae Herba	BL08	hexanal	55.71	0.45
Atractylodes Macrocephala Koidz.	BZ01	atractylenolide i	37.37	0.06
Atractylodes Macrocephala Koidz.	BZ02	atractylenolideII	47.5	0.07
Atractylodes Macrocephala Koidz.	BZ03	atractylenolide iii	68.11	0.08
Atractylodes Macrocephala Koidz.	BZ04	atractylone	41.1	0.08
Atractylodes Macrocephala Koidz.	BZ05	3β-acetoxyatractylone	54.07	0.1
Atractylodes Macrocephala Koidz.	BZ06	biatractylolide	17.45	0.17
Atractylodes Macrocephala Koidz.	BZ07	D-Serine	83.59	0.22
Atractylodes Macrocephala Koidz.	BZ08	alloaromadedrene	53.46	0.3
Curcumae Rhizoma	EZ01	Didemethoxycurcumin (bisdemethoxycurcumin)	77.38	0.33
Curcumae Rhizoma	EZ02	curcumol	103.55	0.06
Curcumae Rhizoma	EZ03	β-elemene	25.63	0.08
Curcumae Rhizoma	EZ04	calarene	51.55	0.27
Poria Cocos (Schw.) Wolf.	FL01	Cerevisterol	37.96	0.77
Poria Cocos (Schw.) Wolf.	FL02	pachyman	0.45	0.68
Poria Cocos (Schw.) Wolf.	FL03	pachymic acid	33.63	0.81
Poria Cocos (Schw.) Wolf.	FL04	Tumulosic acid	29.88	0.81
Poria Cocos (Schw.) Wolf.	FL05	Trimethyl citrate	67.61	0.07
Poria Cocos (Schw.) Wolf.	FL06	dehydroeburicoic acid	44.17	0.83
Licorice	GC01	isoliquiritigenin	85.32	0.01
Licorice	GC02	Dimethyl phthalate;	57.4	0.81
Licorice	GC03	Glepidotin B	64.46	0.18
Licorice	GC04	Glypallichalcone	61.6	0.2
Licorice	GC05	echinatin	66.58	0.2
Licorice	GC06	Dibenzoylmethane	62.26	0.2
Licorice	GC07	dehydroglyasperins C	53.82	0.81
Licorice	GC08	Licochalcone B	76.76	0.21
Licorice	GC09	licochalcone C	4.44	0.21
Licorice	GC10	licochalconeD	1.01	0.21
Licorice	GC11	2,2-DIMETHYLPENTANE	55.33	0.24
Licorice	GC12	licochalcone G	49.25	0.26
Licorice	GC13	Licoarylcoumarin	59.62	0.27
Licorice	GC14	Licoricone	63.58	0.28
Licorice	GC15	Gancaonin A	51.08	0.29
Licorice	GC16	Gancaonin L	66.37	0.32
Licorice	GC17	Glycyrin	52.61	0.36
Licorice	GC18	licoisoflavanone	52.47	0.38
Licorice	GC19	licorice-saponin C2	59.66	0.38
Licorice	GC20	shinpterocarpin	80.3	0.4
Licorice	GC21	licorice-saponin B2	58.55	0.42
Licorice	GC22	liquiritin	65.69	0.43
Licorice	GC23	licopyranocoumarin	80.36	0.43
Licorice	GC24	Hispaglabridin B	22.94	0.44
Licorice	GC25	Glyzaglabrin	61.07	0.44
Licorice	GC26	Glabridin	53.25	0.44
Licorice	GC27	D-Menthol	59.33	0.86
Licorice	GC28	Glabrone	52.51	0.45
Licorice	GC29	Xambioona	54.85	0.8
Licorice	GC30	liquiritigenin (Phaseol)	78.77	0.79
Licorice	GC31	Hexahydrotoluene	56.2	0.47
Licorice	GC32	Methylcyclopentane	55.78	0.47
Licorice	GC33	Isohexane	56.13	0.53
Licorice	GC34	Licoagroisoflavone	57.28	0.78
Licorice	GC35	Cyclobutanol	93.23	0.55
Licorice	GC36	1-Methoxyphaseollidin	69.98	0.6
Licorice	GC37	Glyasperins M	72.67	0.77
Licorice	GC38	licochalcone A	40.79	0.65
Licorice	GC39	Licoagrocarpin	58.81	0.76
Licorice	GC40	Gancaonin H	50.1	0.76
Licorice	GC41	8-prenylated eriodictyol	53.79	0.74
Licorice	GC42	Vestitol	74.66	0.75
Licorice	GC43	Gancaonin G	60.44	0.76
Hedysarum Multijugum Maxim.	HQ01	formononetin	69.67	0.13
Hedysarum Multijugum Maxim.	HQ02	astragalosideI	46.79	0.2
Hedysarum Multijugum Maxim.	HQ03	astragalosideI_qt	12.34	0.21
Hedysarum Multijugum Maxim.	HQ04	astragalosideII	46.06	0.24
Hedysarum Multijugum Maxim.	HQ05	astragalosideII_qt	11.55	0.24
Hedysarum Multijugum Maxim.	HQ06	astragalosideⅢ	31.83	0.25
Hedysarum Multijugum Maxim.	HQ07	astragalosideⅢ_qt	5.35	0.26
Hedysarum Multijugum Maxim.	HQ08	astragalosideⅣ	22.5	0.26
Hedysarum Multijugum Maxim.	HQ09	astragalosideⅣ_qt	7.07	0.26
Hedysarum Multijugum Maxim.	HQ10	AstragalosideIV	17.74	0.27
Hedysarum Multijugum Maxim.	HQ11	AstragalosideIV_qt	7.07	0.28
Hedysarum Multijugum Maxim.	HQ12	Astraisoflavanin	18.37	0.29
Hedysarum Multijugum Maxim.	HQ13	Caffeate	54.97	0.3
Hedysarum Multijugum Maxim.	HQ14	Calycosin	47.75	0.32
Hedysarum Multijugum Maxim.	HQ15	chrysin (Xylose)	51.08	0.38
Hedysarum Multijugum Maxim.	HQ16	Alpha-L-Rhamnose	50.5	0.5
Hedysarum Multijugum Maxim.	HQ17	Folic acid	68.96	0.76
Cornus Officinalis Sieb. Et Zucc	SZ01	oleanolic acid	29.02	0.03
Cornus Officinalis Sieb. Et Zucc	SZ02	Cyclohexanone	74.99	0.78
Cornus Officinalis Sieb. Et Zucc	SZ03	Dibutyl phthalate	64.54	0.75
Cornus Officinalis Sieb. Et Zucc	SZ04	Tert-Butanol	60.45	0.2
Cornus Officinalis Sieb. Et Zucc	SZ05	Dehydromevalonic lactone	53.46	0.28
Cornus Officinalis Sieb. Et Zucc	SZ06	gemin D	68.83	0.33
Cornus Officinalis Sieb. Et Zucc	SZ07	Sweroside aglycone	68.68	0.74
Cornus Officinalis Sieb. Et Zucc	SZ08	(-)-Pulegone	51.23	0.5
Coicis Semen	YY01	vanillin	52	0.3
Coicis Semen	YY02	trans-feruloylstigmasterol	18.49	0.75
Coicis Semen	YY03	Glyceryl trilinoleate	34.91	0.55
Coicis Semen	YY04	(S)-4-Nonanolide	61.84	0.59
Coicis Semen	YY05	feruloyl stigmasterol	18.49	0.68
Coicis Semen	YY06	feruloy ampeaterol	18.81	0.72
